1 **Title:**

2 Chromosome-scale *de novo* diploid assembly of the apple cultivar 'Gala Galaxy'

3

4 **Authors:**

5 Giovanni A.L. Broggin<sup>a,b,\*</sup>, Ina Schlathöler<sup>a,b</sup>, Giancarlo Russo<sup>c</sup>, Dario Copetti<sup>a</sup>, Steven A. Yates<sup>a</sup>, Bruno Studer<sup>a</sup>,

6 Andrea Patocchi<sup>b</sup>

7 a. Molecular Plant Breeding, Institute of Agricultural Sciences, ETH Zurich, Universitaetstrasse 2, 8092

8 Zurich, Switzerland

9 b. Breeding Research, Research Division Plant Breeding, Agroscope, Mueller-Thurgau-Strasse 29, 8820

10 Waedenswil, Switzerland

11 c. Functional Genomics Center Zurich, University of Zurich and ETH Zurich, Winterthurerstrasse 190, 8057,

12 Zurich, Switzerland

13 \*Author for Correspondence: Giovanni A.L. Broggin, Molecular Plant Breeding, Institute of Agricultural Sciences,

14 ETH Zurich, Universitaetstrasse 2, 8092 Zurich, Switzerland, +41584606308, giovanni.broggin@usys.ethz.ch

15

16 **Abstract:**

17 Apple (*Malus x domestica*) is one of the most important fruit crops in terms of worldwide production. Due to its  
18 self-incompatibility system and the long juvenile period, breeding of new apple cultivars combining traits desired  
19 by growers (e.g. yield, pest and disease resistance) and consumers (e.g. fruit size, color, and flavor) is a long and  
20 complex process. Genomics-assisted breeding strategies can facilitate the selection of germplasm leading to new  
21 cultivars. While the most complete apple genome assemblies available to date are from anther-derived  
22 homozygous lines, *de novo* assembly of apple genomes encompassing the natural heterozygosity remains  
23 challenging. Using long- and short-read sequencing technologies in combination with optical mapping, we *de*  
24 *novo* assembled a diploid and heterozygous genome of the apple cultivar 'Gala Galaxy'. This approach resulted in  
25 154 hybrid scaffolds (N50 = 34.3 Mb) spanning 999.9 Mb and in 414.7 Mb of unscaffolded sequences. Anchoring  
26 31 scaffolds with a genetic map was sufficient to represent an entire haploid genome of 17 pseudomolecules  
27 (719.4 Mb). The remaining sequences were assembled in a second set of 17 pseudomolecules, which spanned  
28 601 Mb, leaving 80.6 Mb of unplaced sequences. A total of 41,264 genes were annotated using 74,900  
29 transcripts derived from RNA sequencing of pooled leaf tissue samples. This study provides a high-quality diploid  
30 reference genome sequence encompassing the natural heterozygosity of the widely popular cultivar 'Gala  
31 Galaxy'. The DNA sequence resources and the assembly described here will serve as a solid foundation for  
32 fundamental and applied apple breeding research.

33

34 **Keywords:** Malus, heterozygous, genome, optical mapping, hybrid scaffolds

35 **Introduction:**

36 Apple (*Malus × domestica*) is the third most important fruit crop worldwide, with an annual production reaching 83  
37 million metric tons in 2017 (FAOSTAT 2004). Most of the commercially successful cultivars are susceptible to a  
38 number of pests and diseases (Turechek 2004), and the production of high-quality fruits requires many  
39 applications of plant protection products. Given the increasing public demand to reduce fungicide input, disease  
40 resistant cultivars are essential for future sustainable apple production. Genotypic information has the potential to  
41 speed up the development of resistant cultivars of superior quality (Baumgartner, et al. 2016; Laurens, et al. 2018;  
42 Peace, et al. 2019). However, the number of available molecular markers linked to fruit quality traits is low.  
43 Several projects using genome-wide association studies or establishing genomic selection for fruit quality traits in  
44 apple were initiated (Kumar, et al. 2012; Muranty, et al. 2015; Roth, et al. 2019), often relying on SNP chip-based  
45 genotypic data (Bianco, et al. 2016; Bianco, et al. 2014). Once the association of genetic markers to a trait is  
46 observed, a complete reference genome sequence is a requisite for linking these markers to the underlying  
47 genomic features. With decreasing per base sequencing costs, sequencing-based genotyping (e.g. genotyping-  
48 by-sequencing or skim sequencing) requiring a reference genome for sequence alignment may partly supplant  
49 SNP chip-based genotyping. To meet the challenges described above, several projects already sequenced apple  
50 genomes (Daccord, et al. 2017; Li, et al. 2016; Velasco, et al. 2010; Zhang, et al. 2019). The *de novo* assembly of  
51 heterozygous genomes is recognized as a challenging task, as they generally result more fragmented than  
52 homozygous genomes (Pryszcz and Gabaldon 2016). So far, Velasco (2010) and Li (2016) assembled the  
53 genome of the heterozygous genotype 'Golden Delicious', with both assemblies resulting fragmented (N50 = 16  
54 kb and 111 kb, respectively). Daccord *et al.* (2017) and Zhang *et al.* (2019) overcame the assembly challenges by  
55 sequencing the genome of the homozygous anther-derived lines GDDH13 and HFTH1 obtaining more contiguous  
56 assemblies (N50= 5.5 Mb and 7.0 Mb, respectively).

57 A complete heterozygous genome assembly allows investigating haplotype divergence within a single cultivar, but  
58 also to study the variation in the genome of sport mutants from a specific apple cultivar. Sport mutants are  
59 variations identified as single branches of the original cultivar producing fruits with improved characteristics  
60 (Foster and Aranzana 2018). For instance for the popular cultivar 'Gala', more than 30 sport mutants have been  
61 commercialised (Dickinson and White 1986; Iglesias, et al. 2008) and represent one of the most successful  
62 cultivar group worldwide. The exact reason for the emergence of sport mutants is unclear but likely due to  
63 imperfect repair following errors in DNA replication, active transposable elements (Foster and Aranzana 2018;  
64 Lee, et al. 2016) and/or epimutations (inheritable changes of DNA methylation, histone acetylation or chromatin  
65 remodeling) that influence genes transcription (El-Sharkawy, et al. 2015). Therefore, the availability of a complete  
66 heterozygous (diploid) genome assembly, besides supporting conventional breeding research, can help  
67 understanding the events underlying the generation of novel sport mutants and, more generally, the accumulation  
68 of mutations in this vegetatively propagated crop.

## 69 **Material and Methods:**

### 70 **Assembly strategy**

71 Genomic DNA was isolated from field-grown apple leaves of 'Gala Galaxy' and processed for library construction  
72 for long- and short-reads sequencing as described in the supplementary methods. Additional long-reads libraries  
73 were also generated from four genotypes of the 'Gala' sport mutants group; 'Gala' original, 'Gala Royal', 'Gala  
74 Schnico Red' and the cisgenic apple line C44.4.146 (Kost, et al. 2015). The long-reads libraries from 'Gala  
75 Galaxy' and the additional genotypes were sequenced using PacBio RSII and Sequel instruments, respectively.  
76 The complete PacBio sequence dataset was *de novo* assembled with FALCON Unzip, v.0.4.0 (Chin, et al. 2016).  
77 Contigs consisting in more than 50% organellar (chloroplast or mitochondrial ) genome sequences were identified  
78 by BLAST search (Altschul, et al. 1990) and removed, together with contigs smaller than 1 kb. Short-reads  
79 libraries ('Gala Galaxy') were sequenced on an Illumina HiSeq4000 using the paired-end 150 bp module. These  
80 were used for polishing of the assembly and for genome size estimation as described in the supplementary  
81 methods.

82 Contiguity of the assembly was then increased combining two optical maps to generate dual enzyme hybrid  
83 scaffolds. DNA extraction and labelling, and assembly strategy of the optical maps are described in the  
84 supplementary methods. The scaffolds were then oriented and ordered by ALLMAPS (Tang, et al. 2015) to  
85 achieve a chromosome-scale assembly, as described in the supplementary methods. Several ALLMAPS runs  
86 integrated the two evidence sets producing chromosome-scale pseudomolecules for both sets of homologous  
87 chromosomes. The diploid assembly was investigated for completeness using the Benchmarking Universal  
88 Single-Copy Orthologs (Simao, et al. 2015) pipeline v3.0 with 1,440 conserved plant genes (embryophyta\_odb9)  
89 available in the discovery environment of [www.cyverse.org](http://www.cyverse.org). To evaluate the correctness of the genome assembly,  
90 diagnostic genome features were visualized in RStudio (Version 1.2.5001) using the karyoploteR package (Gel  
91 and Serra 2017) as described in the supplementary methods.

### 92 **Gene Annotation**

93 For evidence-based gene annotation, RNA was extracted separately from 15 pools of three leaves collected from  
94 1-year old field-grown 'Gala Galaxy' trees. Leaves were frozen in liquid nitrogen and ground to fine powder. RNA  
95 extraction protocol and libraries preparation are described in the supplementary methods. Libraries were  
96 sequenced on an Illumina HiSeq4000 instrument, generating paired-end reads (length = 150bp). Reads were  
97 checked for quality using FastQC (<http://www.bioinformatics.babraham.ac.uk/projects/fastqc/>) and trimmed using  
98 fastp (Chen, et al. 2018) retaining only sequences with Q>30. Libraries were mapped against the reference  
99 genome using bowtie2 v2.2.3 (Langmead 2010) and transcripts were identified with cufflinks v2.1 and tophat  
100 2.0.13 (Trapnell, et al. 2012). Transcripts were functionally annotated as described in Knorst et al. (2019). Gene

101 annotations were used to investigate collinearity between haploid assemblies by generating syntenic dotplots  
102 with Synmap2 (Haug-Baltzell, et al. 2017).

### 103 **K-mer Analysis Toolkit**

104 The use of a haploid reference for sequencing read mapping may result problematic if one or both haplotypes  
105 from a heterozygous genotypes show high divergence to the corresponding haplotype in the reference. Sequence  
106 reads from diverging haplotypes would not be mapped to the reference and result in information loss. The k-mer  
107 analysis toolkit (Mapleson, et al. 2016) was used to assess the presence and count of Illumina sequencing data  
108 (in k-mers) of 'Gala Galaxy' (heterozygous) in different assemblies. For this analysis, only forward (R1) Illumina  
109 reads ('Gala Galaxy') were used in the KAT analysis with the GDDH13 assembly (Daccord, et al. 2017) as well as  
110 the diploid assembly reported here as reference. In addition, we included in this analysis a graph-based phased  
111 genome generated as described in the supplementary methods with Whatshap (Patterson, et al. 2015) using the  
112 primary haploid assembly MDGGph\_v1.0 as reference.

## 113 **Results and Discussion**

114 **Sequencing:** For the genotype 'Gala Galaxy', PacBio RSII generated a total of 32 Gb long-reads sequence data  
115 using 29 SMRT cells, while Illumina HiSeq4000 instrument generated 694 million short-reads (104 Gb, submitted  
116 to SRA, accession XXXXXX). Using 19-mers, this latter data allowed estimating a genome size of 710.5 Mb (data  
117 not shown). To increase coverage of long-reads sequences, PacBio Sequel generated additional long-reads  
118 sequence data for other four genotypes of the 'Gala' group; 'Gala' original (5 SMRT cells, 9.4 Gb), 'Gala Royal' (8  
119 SMRT cells, 8.8 Gb), 'Gala Schniga@ SchniCo red' (2 SMRT cells, 8.3 Gb) and C44.4.146 (3 SMRT cells, 11.6  
120 Gb). Combining all generated long-reads data, FALCON unzip produced 2,061 primary contigs and 5,663  
121 haplotigs (N50 = 0.59 Mb, total length = 1,308.97 Mb, Table 1). A total of 201 organellar contigs (total of 8.57 Mb)  
122 and 31 contigs smaller than 1 kb were removed from the assembly.

123 **Scaffolding:** Two optical maps were used for scaffolding of the assembled contigs. The alignment of 316,748  
124 (out of 2,290,666) NLRS-labelled molecules produced 1,662 optical contigs (N50 = 0.65 Mb, total length = 948.63  
125 Mb, coverage = 20x). The alignment of 329,921 (out of 2,117,673) DLE-1 labelled input DNA molecules produced  
126 296 optical contigs (N50 = 15.53 Mb, total length = 1,806.45 Mb, coverage = 29x). Dual enzyme hybrid  
127 scaffolding was performed using Bionano Access v1.2.1 and Bionano Solve v3.2.1. Default settings were used to  
128 perform the hybrid scaffolding. Dual enzyme hybrid scaffolding (incorporating both DLS and NLRS maps) resulted  
129 in a hybrid assembly with N50 of 13.7 Mb (scaffold only N50 = 34.28 Mb) for a total length of 1,414.64 Mb and  
130 consisted of 154 scaffolds (999.96 Mb) and 6,336 unscaffolded contigs (414.68 Mb, Table 1).

131 **Anchoring:** The first round of analyses on the whole hybrid assembly with ALLMAPS identified 31 scaffolds that  
132 were sufficient to represent one haploid genome. Seven pseudomolecules (chr8, 9, 12, 13, 14, 16, and 17) were  
133 covered by one scaffold each. For each one of the remaining pseudomolecules (covered by two to three  
134 scaffolds), overlapping regions between scaffolds were searched and eight overlapping regions were removed  
135 manually. When re-anchored using ALLMAPS, a primary haploid genome (MDGGph\_v1.0) assembly spanning  
136 719 Mb in 17 chromosome-scale pseudomolecules (chr1-17) was generated. Its size is in agreement with the  
137 estimated genome size of 710 Mb. MDGGph\_v1.0 served as haploid reference assembly in order to map long  
138 and short reads generating the graph-based genome for subsequent k-mer analysis. The remaining sequences  
139 were assembled again using ALLMAPS into a second set of 17 pseudomolecules (secondary haploid genome  
140 assembly MDGGsh\_v1.0, chr\_s1-17) spanning 601 Mb, with 80 Mb unanchored sequences. In four cases the  
141 secondary haploid assembly showed longer pseudomolecules when compared to the primary assembly  
142 (chromosomes chr\_s5, chr\_s 6, chr\_s11 and chr\_s 14, supplementary Table 1). This is possibly due to  
143 differences in chromosome length or misassemblies. Unplaced sequences (n = 2,853) spanned only 5.7% of the  
144 total assembly (Table 1).

145

146 Genome visualization displayed Illumina read coverage, SNP phase, and correlation of genetic and physical order  
147 for each chromosome pair on the assembly, as well as links between both alleles of each SNP marker (Genome  
148 visualization, supplementary data). With the exception of a region on chr\_s10, all collapsed regions (with an  
149 Illumina read coverage of about 130x) were present in MDGGph\_v1.0. Our assembly show collinearity with the  
150 genetic map of 'Fuji' × 'Gala'. Phase switches were observed along the pseudomolecules and, as expected, much  
151 lower SNP phase information was found in these collapsed regions (see Genome visualization, supplementary  
152 data).

153 The complete diploid assembly of 'Gala Galaxy' (MDGGdi\_v1.0) obtained by combining primary and secondary  
154 haploid assemblies is available in Genbank as Bioproject XXXXXX. Genome assembly statistics are shown in  
155 Table 1, chromosome sizes are shown in supplementary Table 1, while analysis results of BUSCOs identified in  
156 MDGGdiv1.0, MDGGph\_V1.0 and GDDH13 are shown in supplementary Table 2. The number of complete  
157 BUSCOs identified in MDGGdi\_v1.0 was 1,387 (96.3%), of which 467 (32.4%) were present as single-copy and  
158 920 (63.9%) as duplicated (Table 3). The same analysis on the primary haploid assembly MDGGph\_v1.0  
159 identified 1,347 (93.6%) complete BUSCOs, with 943 (65.5%) being single-copy and 404 (28.1%) were duplicated  
160 (supplementary Table 2).

161 **Gene annotation:** Using RNAseq data, a total of 74,900 leaf transcripts encoded by 41,264 genes were identified  
162 and functionally annotated as described in Knorst et al. (2019). Of the 74,900 proteins searched, 64,765 had an  
163 annotation assigned, of which 59,039 were assigned at least one GO term. The *de novo* annotated primary  
164 assembly MDGGph\_v1.0 and the GDDH13 assembly were used to generate a syntenic dotplot, confirming a  
165 high collinearity between the two assemblies (Supplementary Figure 1).

166 **K-mer analysis:** Kat spectra plots were used to investigate k-mer multiplicity distribution and counting the  
167 occurrence of each k-mer in the investigated assemblies. The distribution of the k-mer counts in the KAT spectra  
168 plot revealed two peaks: the first peak at  $x=27$  represents the heterozygous content (and hence unique  
169 sequences) and the second peak at  $x=58$  the homozygous (Figure 1). The color of the area under the curve  
170 indicated how often k-mers were found in the investigated reference assemblies: black corresponds to k-mers  
171 missing in the assembly, while red and violet correspond to k-mers counted one and twice, respectively. The  
172 black area in the spectrum generated using GDDH13 is clearly larger than the one generated using  
173 MDGGdi\_v1.0 (Figure 1A and 1B). The spectrum generated using the phased graph-based assembly (based on  
174 MDGGph\_v1.0) shows a large black area, but also a violet area under the peak for heterozygous content (Figure  
175 1C).

## 176 Discussion

177 Here, we present a diploid assembly of the heterozygous apple cultivar 'Gala Galaxy' (MDGGdi\_v1.0). Optical  
178 mapping was essential in order to increase the contiguity of the assembly, as shown by the 60-fold increase of

179 N50 values, reaching 34.28 Mb for the hybrid scaffolds only (Table 1) and corresponding to a two-fold increase  
180 compared to the GDDH13 (Daccord, et al. 2017) and HFTH1 (Zhang, et al. 2019) apple genome assemblies.  
181 Despite being diploid, this assembly is unphased, as phase switches assessed by SNP markers were observed  
182 (Supplementary data). Phase switches are probably due to the unzip approach in FALCON, where the choice of  
183 which variant to include in the primary contigs is based on length – resulting in chimeric contigs. Due to the Mb  
184 resolution of the optical map, this data was not helpful in rearranging chimeric scaffolds into correctly phased  
185 scaffolds. BUSCO analyses confirmed that the assembly MDGGdi\_v1.0 is complete, with only 3.7% missing  
186 BUSCOs. The diploid assembly presented in this study represents an advancement over existing resources.  
187 Further improvements might be achieved by separating the collapsed haplotypes and resolving the phase  
188 switches in to a correctly phased genome. Moreover, gene annotation could further be improved by integrating  
189 transcriptome data from different tissue types (e.g. fruits or flowers).

190 Our results clearly show that using a haploid reference is suboptimal to analyse genomic data derived from the  
191 heterozygous apple and might lead to sequence information loss, as indicated by the black area in Figure 1A.  
192 This occurred despite the closeness of these two genotypes (as 'Gala' is an offspring of 'Golden Delicious', from  
193 which the doubled-haploid GDDH13 was derived). Furthermore, the k-mer analysis indicated that a graph-based  
194 approach generated an assembly in which some allelic regions were absent while other were artificially duplicated  
195 (black and violet area in Figure 1C, respectively. Thus, by running WhatsHap on a haploid reference, the second  
196 allele could not be recovered as well as the *de novo* assembly by FALCON Unzip did. This may be a  
197 consequence of a high divergence between allelic regions and therefore, haplotype homology was not resolved  
198 correctly by this approach.

199 This diploid genome will thus be the appropriate reference for achieving the most information from resequencing  
200 projects of sport mutants of this important apple cultivar. Understanding the genome organization and including  
201 genomic information in the breeding process will enable the rapid development of resilient cultivars allowing a  
202 more sustainable production of this important fruit.

203



204 **Availability of supporting data**

205 The Illumina sequencing reads of each sequencing library and the RNA-seq data have been deposited at SRA  
206 with the accessions numbers XXXXXXXX. The genome assembly MDGGdi\_v1.0 was deposited at NCBI as  
207 Bioproject XXXXXXXX. The genome visualization is available as supplementary data.

208 **Funding**

209 This work was supported by the Swiss National Science Foundation Grant 31003A\_163386.

210

211 **Authors' contributions**

212 GALB, BS, and AP designed the study. GALB and GR assembled the genome. IS and GALB collected leaf  
213 samples and extracted DNA. GALB, GR, SAY, and DC analyzed the data. All authors participated to the writing of  
214 the manuscript and approved the final version.

215 **Competing interests**

216 No competing interests declared.

217 **Acknowledgments**

218 We acknowledge the Functional Genomic Centre Zurich, Switzerland, especially Dr. Lucy Poveda, Andrea  
219 Patrignani and Dr. Catharine Aquino-Fournier for the support in generating the genome sequencing data, the  
220 Fruit-Growing Extension Group of Agroscope, Switzerland, for taking care of the plant material and the Method  
221 Development and Analytics Group of Agroscope, Switzerland, for sharing laboratory infrastructures. Part of the  
222 analyses were performed on the CyVerse cyberinfrastructure, which was supported by the National Science  
223 Foundation under Award Numbers DBI-0735191, DBI-1265383, and DBI-1743442. URL: [www.cyverse.org](http://www.cyverse.org)

224

225 **Figures:**

226 Figure 1: K-mers spectra generated using k-mer analysis toolkit (23-mers) with the Illumina reads of 'Gala Galaxy'  
227 against the double-haploid GDDH13 reference genome (A), the diploid genome reference MDGGdi\_v1.0 (B) and  
228 the graph-based diploid phased assembly generated with WhatsHap (C). The overall curve shape indicates the  
229 frequency of the 23-mers in the original Illumina data (apple cv. 'Gala Galaxy'), while the colored area indicate if  
230 the 23-mers are found once (red), twice (violet) or more often (other colors) in the reference genome. The black  
231 area indicate reads that are present in the Illumina sequencing data but absent in reference assemblies.

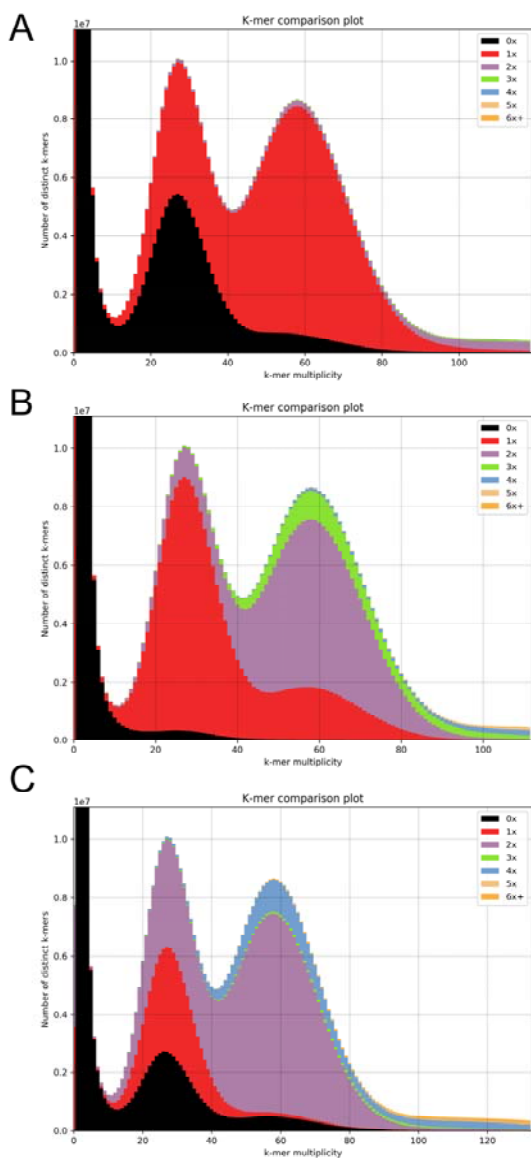

232

233 **Tables:**

234 Table 1: Statistics of the different assemblies generated in this work.

|                                          | <b>Falcon Unzip</b>                       | <b>Two-enzymes<br/>hybrid assembly</b>                         | <b>MDGGph_v1.0<br/>(primary haploid<br/>assembly)</b> | <b>MDGGsh_v1.0<br/>(secondary<br/>haploid<br/>assembly)</b>                          | <b>MDGGdi_v1.0<br/>(diploid<br/>assembly)</b>                                   |
|------------------------------------------|-------------------------------------------|----------------------------------------------------------------|-------------------------------------------------------|--------------------------------------------------------------------------------------|---------------------------------------------------------------------------------|
| <b>Total number of contigs/scaffolds</b> | 2,061 primary contigs and 5,663 haplotigs | 154 hybrid scaffolds and 6336 unscaffolded contigs             | 31 hybrid scaffolds in 17 pseudomolecules             | 3,662 hybrid scaffolds and contigs in 17 pseudomolecules and 2583 unanchored contigs | 34 pseudomolecules from MDGGph_v1.0 and MDGGsh_v1.0 and 2583 unanchored contigs |
| <b>Total length</b>                      | 1,308.969 Mb                              | 1,414.649 Mb (999.96 Mb in scaffolds + 414.68 Mb unscaffolded) | 719.450 Mb                                            | 601.426 Mb + 80.621 Mb of unanchored sequences                                       | 1,401.497 Mb                                                                    |
| <b>N50 length</b>                        | 0.585 Mb                                  | 13.704 Mb (34.286 Mb for hybrid scaffolds only)                |                                                       |                                                                                      |                                                                                 |
| <b>Ns</b>                                |                                           |                                                                | 29,755,402 bp                                         | 70,500,027 bp                                                                        | 100,255,429 bp                                                                  |

235

236 **References:**

- 237 Altschul SF, Gish W, Miller W, Myers EW, Lipman DJ 1990. Basic Local Alignment Search  
238 Tool. *Journal of Molecular Biology* 215: 403-410. doi: Doi 10.1016/S0022-2836(05)80360-  
239 2
- 240 Baumgartner IO, et al. 2016. Development of SNP-based assays for disease resistance and  
241 fruit quality traits in apple (*Malus x domestica* Borkh.) and validation in breeding pilot  
242 studies. *Tree Genetics & Genomes* 12. doi: 10.1007/s11295-016-0994-y
- 243 Bianco L, et al. 2016. Development and validation of the Axiom (R) Apple480K SNP  
244 genotyping array. *Plant Journal* 86: 62-74. doi: 10.1111/tpj.13145
- 245 Bianco L, et al. 2014. Development and Validation of a 20K Single Nucleotide Polymorphism  
246 (SNP) Whole Genome Genotyping Array for Apple (*Malus x domestica* Borkh). *Plos One*  
247 9. doi: 10.1371/journal.pone.0110377
- 248 Chen S, Zhou Y, Chen Y, Gu J 2018. fastp: an ultra-fast all-in-one FASTQ preprocessor.  
249 *Bioinformatics* 34: i884-i890. doi: 10.1093/bioinformatics/bty560
- 250 Chin CS, et al. 2016. Phased diploid genome assembly with single-molecule real-time  
251 sequencing. *Nature Methods* 13: 1050-+. doi: 10.1038/Nmeth.4035
- 252 Daccord N, et al. 2017. High-quality de novo assembly of the apple genome and methylome  
253 dynamics of early fruit development. *Nature Genetics* 49: 1099-+. doi: 10.1038/ng.3886
- 254 Di Pierro EA, et al. 2016. A high-density, multi-parental SNP genetic map on apple validates  
255 a new mapping approach for outcrossing species. *Horticulture Research* 3.  
256 doi:10.1038/hortres.2016.57
- 257 Dickinson JP, White AG 1986. Red Color Distribution in the Skin of Gala Apple and Some of  
258 Its Sports. *New Zealand Journal of Agricultural Research* 29: 695-698.
- 259 El-Sharkawy I, Liang D, Xu KN 2015. Transcriptome analysis of an apple (*Malus x*  
260 *domestica*) yellow fruit somatic mutation identifies a gene network module highly  
261 associated with anthocyanin and epigenetic regulation. *Journal of Experimental Botany*  
262 66: 7359-7376. doi: 10.1093/jxb/erv433

- 263 FAO statistical yearbook [Internet]. Rome: Food and Agriculture Organization of the United  
264 Nations; 2004 9.1.2020]. Available from: <http://www.fao.org/faostat/en/#data>
- 265 Foster TM, Aranzana MJ 2018. Attention sports fans! The far-reaching contributions of bud  
266 sport mutants to horticulture and plant biology. *Horticulture Research* 5.  
267 doi:10.1038/s41438-018-0062-x
- 268 Gel B, Serra E 2017. karyoploteR: an R/Bioconductor package to plot customizable genomes  
269 displaying arbitrary data. *Bioinformatics* 33: 3088-3090. doi:  
270 10.1093/bioinformatics/btx346
- 271 Haug-Baltzell A, Stephens SA, Davey S, Scheidegger CE, Lyons E 2017. SynMap2 and  
272 SynMap3D: web-based whole-genome synteny browsers. *Bioinformatics* 33: 2197-2198.  
273 doi: 10.1093/bioinformatics/btx144
- 274 Iglesias I, Echeverria G, Soria Y 2008. Differences in fruit colour development, anthocyanin  
275 content, fruit quality and consumer acceptability of eight 'Gala' apple strains. *Scientia*  
276 *Horticulturae* 119: 32-40. doi: 10.1016/j.scienta.2008.07.004
- 277 Knorst V, et al. 2019. First assembly of the gene-space of *Lolium multiflorum* and  
278 comparison to other Poaceae genomes. *Grassland Science* 65: 125-134. doi:  
279 10.1111/grs.12225
- 280 Kost TD, et al. 2015. Development of the First Cisgenic Apple with Increased Resistance to  
281 Fire Blight. *Plos One* 10. doi:10.1371/journal.pone.0143980
- 282 Kumar S, et al. 2012. Genomic Selection for Fruit Quality Traits in Apple (*Malus x domestica*  
283 *Borkh.*). *Plos One* 7. doi: 10.1371/journal.pone.0036674
- 284 Langmead B 2010. Aligning short sequencing reads with Bowtie. *Curr Protoc Bioinformatics*  
285 Chapter 11: Unit 11 17. doi: 10.1002/0471250953.bi1107s32
- 286 Laurens F, et al. 2018. An integrated approach for increasing breeding efficiency in apple  
287 and peach in Europe. *Horticulture Research* 5. doi: 10.1038/s41438-018-0016-3
- 288 Lee HS, et al. 2016. Analysis of 'Fuji' apple somatic variants from next-generation  
289 sequencing. *Genetics and Molecular Research* 15. doi: UNSP 15038185

290 10.4238/gmr.15038185

291 Li XW, et al. 2016. Improved hybrid de novo genome assembly of domesticated apple (*Malus*  
292 *x domestica*). *Gigascience* 5. doi: 10.1186/s13742-016-0139-0

293 Mapleson D, Garcia Accinelli G, Kettleborough G, Wright J, Clavijo BJ 2016. KAT: a K-mer  
294 analysis toolkit to quality control NGS datasets and genome assemblies. *Bioinformatics*  
295 33: 574-576.

296 Marçais G, Kingsford C 2011. A fast, lock-free approach for efficient parallel counting of  
297 occurrences of k-mers. *Bioinformatics* 27: 764-770.

298 Muranty H, et al. 2015. Accuracy and responses of genomic selection on key traits in apple  
299 breeding. *Horticulture Research* 2. doi:10.1038/hortres.2015.60

300 Peace CP, et al. 2019. Apple whole genome sequences: recent advances and new  
301 prospects. *Horticulture Research* 6. doi:10.1038/s41438-019-0141-7

302 Prysycz LP, Gabaldon T 2016. Redundans: an assembly pipeline for highly heterozygous  
303 genomes. *Nucleic Acids Research* 44. doi:10.1093/nar/gkw294

304 Roth M, et al. 2019. Prediction of fruit texture with training population optimization for efficient  
305 genomic selection in apple. *bioRxiv*: 862193. doi: 10.1101/862193

306 Simao FA, Waterhouse RM, Ioannidis P, Kriventseva EV, Zdobnov EM 2015. BUSCO:  
307 assessing genome assembly and annotation completeness with single-copy orthologs.  
308 *Bioinformatics* 31: 3210-3212. doi: 10.1093/bioinformatics/btv351

309 Tang HB, et al. 2015. ALLMAPS: robust scaffold ordering based on multiple maps. *Genome*  
310 *Biology* 16. doi:10.1186/s13059-014-0573-1

311 Trapnell C, et al. 2012. Differential gene and transcript expression analysis of RNA-seq  
312 experiments with TopHat and Cufflinks. *Nature Protocols* 7: 562-578. doi:  
313 10.1038/nprot.2012.016

314 Turechek WW. 2004. Apple diseases and their management. In. *Diseases of Fruits and*  
315 *Vegetables Volume I*: Springer. p. 1-108.

- 316 Velasco R, et al. 2010. The genome of the domesticated apple (*Malus x domestica* Borkh.).  
317 Nature Genetics 42: 833-+. doi: 10.1038/ng.654
- 318 Zhang L, et al. 2019. A high-quality apple genome assembly reveals the association of a  
319 retrotransposon and red fruit colour. Nature Communications 10: 1494. doi:  
320 10.1038/s41467-019-09518-x
